# Supplementary material for: LncRNA GAS5 represses stemness and malignancy of gliomas via elevating the SPACA6-miR-125a/let-7e Axis
Source: Front Oncol. 2022 Aug 29;12:803652. doi: 10.3389/fonc.2022.803652 (PMC9465381; doi:10.3389/fonc.2022.803652)
Supplement: Supplementary file 2 [file Table_1.xlsx]

## Sheet: Sheet1
Fold enrichment	Log10(Qvalue)Minus	Gene ID	Symbol	Gene description
453.591	22595.9	ENSG00000270084	GAS5-AS1	GAS5 antisense RNA 1
453.591	22595.9	ENSG00000234741	GAS5	growth arrest specific 5 (non-protein coding)
504.589	3185.56	ENSG00000166206	GABRB3	gamma-aminobutyric acid type A receptor beta3 subunit
239.574	2860.45	ENSG00000234741	GAS5	growth arrest specific 5 (non-protein coding)
337.97	1720.44	ENSG00000161048	NAPEPLD	N-acyl phosphatidylethanolamine phospholipase D
354.116	1350.35	ENSG00000283239	KBTBD11-OT1	KBTBD11 overlapping transcript 1
354.116	1350.35	ENSG00000104728	ARHGEF10	Rho guanine nucleotide exchange factor 10
195.836	1303.64	ENSG00000112159	MDN1	midasin AAA ATPase 1
266.298	935.597	ENSG00000112877	CEP72	centrosomal protein 72
123.886	587.43	ENSG00000076321	KLHL20	kelch like family member 20
88.1162	534.236	ENSG00000076321	KLHL20	kelch like family member 20
111.759	316.897	ENSG00000162601	MYSM1	Myb like, SWIRM and MPN domains 1
14.489	239.719	ENSG00000198712	MT-CO2	mitochondrially encoded cytochrome c oxidase II
14.489	239.719	ENSG00000210156	MT-TK	mitochondrially encoded tRNA lysine
14.489	239.719	ENSG00000228253	MT-ATP8	mitochondrially encoded ATP synthase 8
14.489	239.719	ENSG00000198899	MT-ATP6	mitochondrially encoded ATP synthase 6
14.489	239.719	ENSG00000198938	MT-CO3	mitochondrially encoded cytochrome c oxidase III
14.489	239.719	ENSG00000210164	MT-TG	mitochondrially encoded tRNA glycine
14.489	239.719	ENSG00000198840	MT-ND3	mitochondrially encoded NADH:ubiquinone oxidoreductase core subunit 3
14.489	239.719	ENSG00000210174	MT-TR	mitochondrially encoded tRNA arginine
14.489	239.719	ENSG00000212907	MT-ND4L	mitochondrially encoded NADH:ubiquinone oxidoreductase core subunit 4L
14.489	239.719	ENSG00000198886	MT-ND4	mitochondrially encoded NADH:ubiquinone oxidoreductase core subunit 4
14.489	239.719	ENSG00000210176	MT-TH	mitochondrially encoded tRNA histidine
14.489	239.719	ENSG00000210184	MT-TS2	mitochondrially encoded tRNA serine 2 (AGU/C)
14.489	239.719	ENSG00000210191	MT-TL2	mitochondrially encoded tRNA leucine 2 (CUN)
14.489	239.719	ENSG00000198786	MT-ND5	mitochondrially encoded NADH:ubiquinone oxidoreductase core subunit 5
14.489	239.719	ENSG00000198695	MT-ND6	mitochondrially encoded NADH:ubiquinone oxidoreductase core subunit 6
14.489	239.719	ENSG00000210194	MT-TE	mitochondrially encoded tRNA glutamic acid
14.489	239.719	ENSG00000198727	MT-CYB	mitochondrially encoded cytochrome b
14.489	239.719	ENSG00000210195	MT-TT	mitochondrially encoded tRNA threonine
14.489	239.719	ENSG00000210196	MT-TP	mitochondrially encoded tRNA proline
20.4361	228.34	ENSG00000210082	MT-RNR2	mitochondrially encoded 16S RNA
58.1483	170.491	ENSG00000150712	MTMR12	myotubularin related protein 12
62.7857	163.054	ENSG00000162601	MYSM1	Myb like, SWIRM and MPN domains 1
8.58199	141.949	ENSG00000251562	MALAT1	metastasis associated lung adenocarcinoma transcript 1 (non-protein coding)
48.0822	141.652	ENSG00000169862	CTNND2	catenin delta 2
52.5672	141.145	ENSG00000238184	CD81-AS1	CD81 antisense RNA 1
56.3128	138.368	ENSG00000170017	ALCAM	activated leukocyte cell adhesion molecule
4.53427	122.132	ENSG00000283029	AL139099.5	---
4.53427	122.132	ENSG00000276168	RN7SL1	RNA, 7SL, cytoplasmic 1
4.53427	122.132	ENSG00000213741	RPS29	ribosomal protein S29
49.0542	116.41	ENSG00000278996	FP671120.1	---
46.4195	114.828	ENSG00000162601	MYSM1	Myb like, SWIRM and MPN domains 1
42.4193	99.5972	ENSG00000185291	IL3RA	interleukin 3 receptor subunit alpha
39.3571	91.9852	ENSG00000225350	FREM2-AS1	FREM2 antisense RNA 1
39.3571	91.9852	ENSG00000150893	FREM2	FRAS1 related extracellular matrix protein 2
24.4418	86.9807	ENSG00000108953	YWHAE	tyrosine 3-monooxygenase/tryptophan 5-monooxygenase activation protein epsilon
32.2583	76.3684	ENSG00000130518	KIAA1683	KIAA1683
16.5957	74.3263	ENSG00000248527	MTATP6P1	mitochondrially encoded ATP synthase 6 pseudogene 1
16.5957	74.3263	ENSG00000230021	AL669831.3	---
4.02754	67.5394	ENSG00000210135	MT-TN	mitochondrially encoded tRNA asparagine
4.02754	67.5394	ENSG00000210140	MT-TC	mitochondrially encoded tRNA cysteine
4.02754	67.5394	ENSG00000210144	MT-TY	mitochondrially encoded tRNA tyrosine
4.02754	67.5394	ENSG00000198804	MT-CO1	mitochondrially encoded cytochrome c oxidase I
4.02754	67.5394	ENSG00000210151	MT-TS1	mitochondrially encoded tRNA serine 1 (UCN)
7.00606	62.3317	ENSG00000210082	MT-RNR2	mitochondrially encoded 16S RNA
7.00606	62.3317	ENSG00000209082	MT-TL1	mitochondrially encoded tRNA leucine 1 (UUA/G)
7.00606	62.3317	ENSG00000198888	MT-ND1	mitochondrially encoded NADH:ubiquinone oxidoreductase core subunit 1
7.00606	62.3317	ENSG00000210100	MT-TI	mitochondrially encoded tRNA isoleucine
22.5692	56.8239	ENSG00000075413	MARK3	microtubule affinity regulating kinase 3
21.5879	53.7624	ENSG00000163738	MTHFD2L	methylenetetrahydrofolate dehydrogenase (NADP+ dependent) 2 like
21.5879	53.7624	ENSG00000145781	COMMD10	COMM domain containing 10
25.9927	53.0493	ENSG00000168411	RFWD3	ring finger and WD repeat domain 3
25.9803	51.5262	ENSG00000135823	STX6	syntaxin 6
6.66963	49.3151	ENSG00000198763	MT-ND2	mitochondrially encoded NADH:ubiquinone oxidoreductase core subunit 2
19.6254	47.6934	ENSG00000119326	CTNNAL1	catenin alpha like 1
22.5819	47.6692	ENSG00000143952	VPS54	VPS54, GARP complex subunit
23.8153	45.6849	ENSG00000009954	BAZ1B	bromodomain adjacent to zinc finger domain 1B
23.3915	44.9493	ENSG00000276672	AL161891.1	---
23.3915	44.9493	ENSG00000133119	RFC3	replication factor C subunit 3
18.6441	44.6911	ENSG00000131848	ZSCAN5A	zinc finger and SCAN domain containing 5A
19.4014	43.5585	ENSG00000177917	ARL6IP6	ADP ribosylation factor like GTPase 6 interacting protein 6
21.6609	41.9909	ENSG00000011454	RABGAP1	RAB GTPase activating protein 1
22.4898	41.9164	ENSG00000173638	SLC19A1	solute carrier family 19 member 1
22.4898	41.9164	ENSG00000182871	COL18A1	collagen type XVIII alpha 1 chain
16.6816	38.7633	ENSG00000203740	METTL11B	methyltransferase like 11B
16.6816	38.7633	ENSG00000076321	KLHL20	kelch like family member 20
16.6816	38.7633	ENSG00000061987	MON2	MON2 homolog, regulator of endosome-to-Golgi trafficking
16.6816	38.7633	ENSG00000263812	LINC00908	long intergenic non-protein coding RNA 908
16.6816	38.7633	ENSG00000105605	CACNG7	calcium voltage-gated channel auxiliary subunit gamma 7
16.6816	38.7633	ENSG00000169436	COL22A1	collagen type XXII alpha 1 chain
18.1596	37.4656	ENSG00000137073	UBAP2	ubiquitin associated protein 2
20.0601	36.665	ENSG00000204262	COL5A2	collagen type V alpha 2 chain
15.7003	35.8495	ENSG00000196369	SRGAP2B	SLIT-ROBO Rho GTPase activating protein 2B
15.7003	35.8495	ENSG00000249740	OSMR-AS1	OSMR antisense RNA 1 (head to head)
15.7003	35.8495	ENSG00000158321	AUTS2	AUTS2, activator of transcription and developmental regulator
16.4912	35.2709	ENSG00000170145	SIK2	salt inducible kinase 2
16.4912	35.2709	ENSG00000213918	DNASE1	deoxyribonuclease 1
16.4912	35.2709	ENSG00000263934	SNORD3A	small nucleolar RNA, C/D box 3A
16.4912	35.2709	ENSG00000144724	PTPRG	protein tyrosine phosphatase, receptor type G
17.2038	34.8801	ENSG00000105983	LMBR1	limb development membrane protein 1
17.0779	33.6843	ENSG00000151914	DST	dystonin
17.6394	33.2995	ENSG00000147862	NFIB	nuclear factor I B
17.6394	33.2995	ENSG00000023318	ERP44	endoplasmic reticulum protein 44
14.719	32.9551	ENSG00000136631	VPS45	vacuolar protein sorting 45 homolog
14.719	32.9551	ENSG00000185420	SMYD3	SET and MYND domain containing 3
14.719	32.9551	ENSG00000148516	ZEB1	zinc finger E-box binding homeobox 1
14.719	32.9551	ENSG00000176473	WDR25	WD repeat domain 25
14.719	32.9551	ENSG00000224514	LINC00620	long intergenic non-protein coding RNA 620
14.719	32.9551	ENSG00000223797	ENTPD3-AS1	ENTPD3 antisense RNA 1
14.719	32.9551	ENSG00000232633	AC079465.1	---
14.719	32.9551	ENSG00000171444	MCC	mutated in colorectal cancers
14.719	32.9551	ENSG00000224101	ELMO1-AS1	ELMO1 antisense RNA 1
14.719	32.9551	ENSG00000155849	ELMO1	engulfment and cell motility 1
14.719	32.9551	ENSG00000173681	BCLAF3	BCLAF1 and THRAP3 family member 3
16.248	32.3415	ENSG00000126217	MCF2L	MCF.2 cell line derived transforming sequence like
17.3904	31.847	ENSG00000146776	ATXN7L1	ataxin 7 like 1
16.863	31.0937	ENSG00000160285	LSS	lanosterol synthase
13.3182	31.0933	ENSG00000108953	YWHAE	tyrosine 3-monooxygenase/tryptophan 5-monooxygenase activation protein epsilon
18.0419	30.7882	ENSG00000138442	WDR12	WD repeat domain 12
14.5511	29.8942	ENSG00000173715	C11orf80	chromosome 11 open reading frame 80
14.5511	29.8942	ENSG00000272741	AC069257.3	---
14.5511	29.8942	ENSG00000213123	TCTEX1D2	Tctex1 domain containing 2
14.5511	29.8942	ENSG00000153956	CACNA2D1	calcium voltage-gated channel auxiliary subunit alpha2delta 1
16.3719	29.6516	ENSG00000151835	SACS	sacsin molecular chaperone
15.8965	29.3869	ENSG00000156831	NSMCE2	NSE2/MMS21 homolog, SMC5-SMC6 complex SUMO ligase
13.7651	29.19	ENSG00000250305	KIAA1456	KIAA1456
16.6969	29.0713	ENSG00000133112	TPT1	tumor protein, translationally-controlled 1
15.7826	28.6184	ENSG00000115760	BIRC6	baculoviral IAP repeat containing 6
12.6352	28.523	ENSG00000130294	KIF1A	kinesin family member 1A
15.6704	27.9223	ENSG00000105810	CDK6	cyclin dependent kinase 6
16.1334	27.8378	ENSG00000135823	STX6	syntaxin 6
16.4607	27.697	ENSG00000114374	USP9Y	ubiquitin specific peptidase 9, Y-linked
14.3365	27.2835	ENSG00000120656	TAF12	TATA-box binding protein associated factor 12
12.7565	27.2835	ENSG00000160062	ZBTB8A	zinc finger and BTB domain containing 8A
12.7565	27.2835	ENSG00000254553	AL033529.1	---
12.7565	27.2835	ENSG00000171943	SRGAP2C	SLIT-ROBO Rho GTPase activating protein 2C
12.7565	27.2835	ENSG00000143437	ARNT	aryl hydrocarbon receptor nuclear translocator
12.7565	27.2835	ENSG00000075945	KIFAP3	kinesin associated protein 3
12.7565	27.2835	ENSG00000076321	KLHL20	kelch like family member 20
12.7565	27.2835	ENSG00000170959	DCDC1	doublecortin domain containing 1
12.7565	27.2835	ENSG00000137478	FCHSD2	FCH and double SH3 domains 2
12.7565	27.2835	ENSG00000168014	C2CD3	C2 calcium dependent domain containing 3
12.7565	27.2835	ENSG00000118363	SPCS2	signal peptidase complex subunit 2
12.7565	27.2835	ENSG00000134152	KATNBL1	katanin regulatory subunit B1 like 1
12.7565	27.2835	ENSG00000141084	RANBP10	RAN binding protein 10
12.7565	27.2835	ENSG00000134278	SPIRE1	spire type actin nucleation factor 1
12.7565	27.2835	ENSG00000066926	FECH	ferrochelatase
12.7565	27.2835	ENSG00000203386	LINC01317	long intergenic non-protein coding RNA 1317
12.7565	27.2835	ENSG00000178385	PLEKHM3	pleckstrin homology domain containing M3
12.7565	27.2835	ENSG00000021826	CPS1	carbamoyl-phosphate synthase 1
12.7565	27.2835	ENSG00000085982	USP40	ubiquitin specific peptidase 40
12.7565	27.2835	ENSG00000146263	MMS22L	MMS22 like, DNA repair protein
12.7565	27.2835	ENSG00000146776	ATXN7L1	ataxin 7 like 1
14.3365	27.2835	ENSG00000104218	CSPP1	centrosome and spindle pole associated protein 1
12.9785	26.5499	ENSG00000283426	AC233280.20	---
12.9785	26.5499	ENSG00000242086	LINC00969	long intergenic non-protein coding RNA 969
14.8543	26.3316	ENSG00000133460	SLC2A11	solute carrier family 2 member 11
14.8543	26.3316	ENSG00000251357	AP000350.4	---
14.2316	26.33	ENSG00000169855	ROBO1	roundabout guidance receptor 1
12.706	26.2439	ENSG00000196236	XPNPEP3	X-prolyl aminopeptidase 3
15.2371	25.7048	ENSG00000255847	AP003717.1	---
15.2371	25.7048	ENSG00000187726	DNAJB13	DnaJ heat shock protein family (Hsp40) member B13
15.2371	25.7048	ENSG00000198218	QRICH1	glutamine rich 1
15.8768	25.5005	ENSG00000151914	DST	dystonin
14.1282	25.4734	ENSG00000100207	TCF20	transcription factor 20
12.6109	24.638	ENSG00000117593	DARS2	aspartyl-tRNA synthetase 2, mitochondrial
12.6109	24.638	ENSG00000118200	CAMSAP2	calmodulin regulated spectrin associated protein family member 2
12.6109	24.638	ENSG00000151746	BICD1	BICD cargo adaptor 1
12.6109	24.638	ENSG00000120832	MTERF2	mitochondrial transcription termination factor 2
12.6109	24.638	ENSG00000284196	AL158064.2	---
12.6109	24.638	ENSG00000214595	EML6	echinoderm microtubule associated protein like 6
12.6109	24.638	ENSG00000185008	ROBO2	roundabout guidance receptor 2
12.6109	24.638	ENSG00000145687	SSBP2	single stranded DNA binding protein 2
12.6109	24.638	ENSG00000170873	MTSS1	MTSS1, I-BAR domain containing
14.5418	24.5462	ENSG00000105605	CACNG7	calcium voltage-gated channel auxiliary subunit gamma 7
11.7752	24.5228	ENSG00000150275	PCDH15	protocadherin related 15
11.7752	24.5228	ENSG00000236744	AC016822.1	---
11.7752	24.5228	ENSG00000058272	PPP1R12A	protein phosphatase 1 regulatory subunit 12A
11.7752	24.5228	ENSG00000157823	AP3S2	adaptor related protein complex 3 sigma 2 subunit
11.7752	24.5228	ENSG00000250021	C15orf38-AP3S2	C15orf38-AP3S2 readthrough
11.7752	24.5228	ENSG00000119326	CTNNAL1	catenin alpha like 1
14.9275	24.4033	ENSG00000153914	SREK1	splicing regulatory glutamic acid and lysine rich protein 1
13.9259	24.0581	ENSG00000129515	SNX6	sorting nexin 6
13.2828	23.9326	ENSG00000257545	AC079385.1	---
13.2828	23.9326	ENSG00000111783	RFX4	regulatory factor X4
14.728	23.6399	ENSG00000197860	SGTB	small glutamine rich tetratricopeptide repeat containing beta
13.8268	23.4515	ENSG00000092820	EZR	ezrin
13.0299	22.902	ENSG00000124222	STX16	syntaxin 16
13.0299	22.902	ENSG00000254995	STX16-NPEPL1	STX16-NPEPL1 readthrough (NMD candidate)
12.425	22.3989	ENSG00000155816	FMN2	formin 2
12.425	22.3989	ENSG00000182463	TSHZ2	teashirt zinc finger homeobox 2
12.425	22.3989	ENSG00000271774	AL109930.1	---
12.425	22.3989	ENSG00000181090	EHMT1	euchromatic histone lysine methyltransferase 1
14.0494	22.3363	ENSG00000196628	TCF4	transcription factor 4
12.9975	21.7956	ENSG00000156787	TBC1D31	TBC1 domain family member 31
10.794	21.767	ENSG00000094963	FMO2	flavin containing monooxygenase 2
10.794	21.767	ENSG00000151746	BICD1	BICD cargo adaptor 1
10.794	21.767	ENSG00000174099	MSRB3	methionine sulfoxide reductase B3
10.794	21.767	ENSG00000013503	POLR3B	RNA polymerase III subunit B
10.794	21.767	ENSG00000151445	VIPAS39	VPS33B interacting protein, apical-basolateral polarity regulator, spe-39 homolog
10.794	21.767	ENSG00000137878	GCOM1	GRINL1A complex locus 1
10.794	21.767	ENSG00000263155	MYZAP	myocardial zonula adherens protein
10.794	21.767	ENSG00000278540	ACACA	acetyl-CoA carboxylase alpha
10.794	21.767	ENSG00000175175	PPM1E	protein phosphatase, Mg2+/Mn2+ dependent 1E
10.794	21.767	ENSG00000276411	AC106875.2	---
10.794	21.767	ENSG00000198399	ITSN2	intersectin 2
10.794	21.767	ENSG00000230876	LINC00486	long intergenic non-protein coding RNA 486
10.794	21.767	ENSG00000011566	MAP4K3	mitogen-activated protein kinase kinase kinase kinase 3
10.794	21.767	ENSG00000179915	NRXN1	neurexin 1
10.794	21.767	ENSG00000163170	BOLA3	bolA family member 3
10.794	21.767	ENSG00000136002	ARHGEF4	Rho guanine nucleotide exchange factor 4
10.794	21.767	ENSG00000153250	RBMS1	RNA binding motif single stranded interacting protein 1
10.794	21.767	ENSG00000182621	PLCB1	phospholipase C beta 1
10.794	21.767	ENSG00000149654	CDH22	cadherin 22
10.794	21.767	ENSG00000099942	CRKL	CRK like proto-oncogene, adaptor protein
10.794	21.767	ENSG00000237037	NDUFA6-AS1	NDUFA6 antisense RNA 1 (head to head)
10.794	21.767	ENSG00000186732	MPPED1	metallophosphoesterase domain containing 1
10.794	21.767	ENSG00000219438	FAM19A5	family with sequence similarity 19 member A5, C-C motif chemokine like
10.794	21.767	ENSG00000159685	CHCHD6	coiled-coil-helix-coiled-coil-helix domain containing 6
10.794	21.767	ENSG00000073711	PPP2R3A	protein phosphatase 2 regulatory subunit Balpha
10.794	21.767	ENSG00000048342	CC2D2A	coiled-coil and C2 domain containing 2A
10.794	21.767	ENSG00000112902	SEMA5A	semaphorin 5A
10.794	21.767	ENSG00000082074	FYB1	FYN binding protein 1
10.794	21.767	ENSG00000113391	FAM172A	family with sequence similarity 172 member A
10.794	21.767	ENSG00000145819	ARHGAP26	Rho GTPase activating protein 26
10.794	21.767	ENSG00000164418	GRIK2	glutamate ionotropic receptor kainate type subunit 2
10.794	21.767	ENSG00000164494	PDSS2	decaprenyl diphosphate synthase subunit 2
10.794	21.767	ENSG00000146350	TBC1D32	TBC1 domain family member 32
10.794	21.767	ENSG00000071242	RPS6KA2	ribosomal protein S6 kinase A2
10.794	21.767	ENSG00000227965	AC098592.2	---
10.794	21.767	ENSG00000226278	PSPHP1	phosphoserine phosphatase pseudogene 1
10.794	21.767	ENSG00000158623	COPG2	coatomer protein complex subunit gamma 2
10.794	21.767	ENSG00000131558	EXOC4	exocyst complex component 4
10.794	21.767	ENSG00000253802	AC105999.2	---
10.794	21.767	ENSG00000107201	DDX58	DExD/H-box helicase 58
10.794	21.767	ENSG00000023318	ERP44	endoplasmic reticulum protein 44
10.794	21.767	ENSG00000198947	DMD	dystrophin
10.794	21.767	ENSG00000214827	MTCP1	mature T-cell proliferation 1
12.334	21.6186	ENSG00000139625	MAP3K12	mitogen-activated protein kinase kinase kinase 12
12.334	21.6186	ENSG00000275066	SYNRG	synergin gamma
11.4054	21.4614	ENSG00000165322	ARHGAP12	Rho GTPase activating protein 12
13.3522	21.125	ENSG00000151322	NPAS3	neuronal PAS domain protein 3
10.7512	20.9317	ENSG00000179163	FUCA1	fucosidase, alpha-L- 1, tissue
10.7512	20.9317	ENSG00000087206	UIMC1	ubiquitin interaction motif containing 1
12.2444	20.8791	ENSG00000124208	TMEM189-UBE2V1	TMEM189-UBE2V1 readthrough
12.2444	20.8791	ENSG00000240849	TMEM189	transmembrane protein 189
12.9846	20.663	ENSG00000187323	DCC	DCC netrin 1 receptor
13.5008	20.4539	ENSG00000179242	CDH4	cadherin 4
12.9953	19.6962	ENSG00000126653	NSRP1	nuclear speckle splicing regulatory protein 1
12.9953	19.6962	ENSG00000018189	RUFY3	RUN and FYVE domain containing 3
12.9953	19.6962	ENSG00000012660	ELOVL5	ELOVL fatty acid elongase 5
12.0691	19.6343	ENSG00000165323	FAT3	FAT atypical cadherin 3
12.0691	19.6343	ENSG00000103647	CORO2B	coronin 2B
12.0691	19.6343	ENSG00000179965	ZNF771	zinc finger protein 771
12.0691	19.6343	ENSG00000182310	SPACA6	sperm acrosome associated 6
10.6708	19.5774	ENSG00000095564	BTAF1	B-TFIID TATA-box binding protein associated factor 1
10.6708	19.5774	ENSG00000175581	MRPL48	mitochondrial ribosomal protein L48
10.6708	19.5774	ENSG00000144036	EXOC6B	exocyst complex component 6B
10.6708	19.5774	ENSG00000169139	UBE2V2	ubiquitin conjugating enzyme E2 V2
10.6708	19.5774	ENSG00000034677	RNF19A	ring finger protein 19A, RBR E3 ubiquitin protein ligase
9.8127	19.1147	ENSG00000105605	CACNG7	calcium voltage-gated channel auxiliary subunit gamma 7
9.8127	19.1147	ENSG00000179915	NRXN1	neurexin 1
9.8127	19.1147	ENSG00000249252	AC098829.1	---
9.8127	19.1147	ENSG00000198589	LRBA	LPS responsive beige-like anchor protein
11.8987	18.6418	ENSG00000166682	TMPRSS5	transmembrane protease, serine 5
11.8987	18.6418	ENSG00000047662	FAM184B	family with sequence similarity 184 member B
11.8987	18.6418	ENSG00000006634	DBF4	DBF4 zinc finger
11.8153	18.1982	ENSG00000101639	CEP192	centrosomal protein 192
11.733	17.7844	ENSG00000166260	COX11	COX11, cytochrome c oxidase copper chaperone
11.733	17.7844	ENSG00000141198	TOM1L1	target of myb1 like 1 membrane trafficking protein
12.1289	17.7488	ENSG00000135250	SRPK2	SRSF protein kinase 2
10.5134	17.6835	ENSG00000006007	GDE1	glycerophosphodiester phosphodiesterase 1
10.5134	17.6835	ENSG00000147044	CASK	calcium/calmodulin dependent serine protein kinase
11.1407	17.451	ENSG00000148110	MFSD14B	major facilitator superfamily domain containing 14B
12.1813	17.1342	ENSG00000172992	DCAKD	dephospho-CoA kinase domain containing
12.2685	17.1331	ENSG00000275833	AC073107.2	---
12.2685	17.1331	ENSG00000272693	AC073107.1	---
9.7007	17.0697	ENSG00000092531	SNAP23	synaptosome associated protein 23
10.4365	16.9617	ENSG00000273167	AL359736.1	---
10.4365	16.9617	ENSG00000182957	SPATA13	spermatogenesis associated 13
10.4365	16.9617	ENSG00000161654	LSM12	LSM12 homolog
10.4365	16.9617	ENSG00000172845	SP3	Sp3 transcription factor
8.83143	16.439	ENSG00000189337	KAZN	kazrin, periplakin interacting protein
8.83143	16.439	ENSG00000198815	FOXJ3	forkhead box J3
8.83143	16.439	ENSG00000186094	AGBL4	ATP/GTP binding protein like 4
8.83143	16.439	ENSG00000134744	ZCCHC11	zinc finger CCHC-type containing 11
8.83143	16.439	ENSG00000172456	FGGY	FGGY carbohydrate kinase domain containing
8.83143	16.439	ENSG00000033122	LRRC7	leucine rich repeat containing 7
8.83143	16.439	ENSG00000168509	HFE2	hemochromatosis type 2 (juvenile)
11.4151	16.439	ENSG00000116539	ASH1L	ASH1 like histone lysine methyltransferase
8.83143	16.439	ENSG00000143156	NME7	NME/NM23 family member 7
8.83143	16.439	ENSG00000162819	BROX	BRO1 domain and CAAX motif containing
8.83143	16.439	ENSG00000148426	PROSER2	proline and serine rich 2
8.83143	16.439	ENSG00000119912	IDE	insulin degrading enzyme
8.83143	16.439	ENSG00000229386	OR8B9P	olfactory receptor family 8 subfamily B member 9 pseudogene
8.83143	16.439	ENSG00000134532	SOX5	SRY-box 5
8.83143	16.439	ENSG00000110841	PPFIBP1	PPFIA binding protein 1
8.83143	16.439	ENSG00000067798	NAV3	neuron navigator 3
8.83143	16.439	ENSG00000139324	TMTC3	transmembrane and tetratricopeptide repeat containing 3
8.83143	16.439	ENSG00000028203	VEZT	vezatin, adherens junctions transmembrane protein
8.83143	16.439	ENSG00000089169	RPH3A	rabphilin 3A
8.83143	16.439	ENSG00000258932	AL390334.1	---
8.83143	16.439	ENSG00000258628	AC126603.1	---
8.83143	16.439	ENSG00000104059	FAM189A1	family with sequence similarity 189 member A1
8.83143	16.439	ENSG00000103544	C16orf62	chromosome 16 open reading frame 62
8.83143	16.439	ENSG00000090905	TNRC6A	trinucleotide repeat containing 6A
8.83143	16.439	ENSG00000245768	AC092378.1	---
8.83143	16.439	ENSG00000131242	RAB11FIP4	RAB11 family interacting protein 4
